1 **Title: Lactate receptor HCAR1 regulates neurogenesis and microglia**  
2 **activation after neonatal hypoxia-ischemia**

3 **Short running title: Lactate receptor HCAR1 regulates brain repair**

4 **Lauritz H. Kennedy<sup>1</sup>, Emilie R. Glesaaen<sup>1</sup>, Vuk Palibrk<sup>2</sup>, Marco Pannone<sup>1,2</sup>, Wei Wang<sup>2</sup>,**  
5 **Ali H.J. Al-Jabri<sup>1</sup>, Rajikala Suganthan<sup>1</sup>, Niklas Meyer<sup>1</sup>, Xiaolin Lin<sup>1,2</sup>, Linda H.**  
6 **Bergersen<sup>3,4</sup>, Magnar Bjørås<sup>1,2#</sup> and Johanne E. Rinholm<sup>1#\*</sup>**

7

8 <sup>1</sup> Department of Microbiology, Oslo University Hospital and University of Oslo, NO-0424  
9 Oslo, Norway

10 <sup>2</sup> Department of Clinical and Molecular Medicine, Norwegian University of Science and  
11 Technology, 7028 Trondheim, Norway

12 <sup>3</sup> The Brain and Muscle Energy Group, Institute of Oral Biology, Faculty of Dentistry,  
13 University of Oslo, NO-0318 Oslo, Norway.

14 <sup>4</sup> Center for Healthy Aging, Department of Neuroscience and Pharmacology, Faculty of  
15 Health Sciences, University of Copenhagen, DK-2200 Copenhagen N, Denmark.

16

17 # M.B. and J.E.R. contributed equally to this work.

18 \* **Corresponding author:** Johanne Egge Rinholm, [j.e.rinholm@medisin.uio.no](mailto:j.e.rinholm@medisin.uio.no), Tel: +47 90  
19 76 83 82

20

21

22

23

24

25

## 26 **Abstract**

27 Neonatal cerebral hypoxia-ischemia (HI) is the leading cause of death and disability in  
28 newborns with the only current treatment option being hypothermia. An increased  
29 understanding of the pathways that facilitate tissue repair after HI can aid the development of  
30 better treatments. Here we have studied the role of lactate receptor HCAR1  
31 (Hydroxycarboxylic acid receptor 1) in tissue repair after HI in mice. We show that HCAR1  
32 knockout (KO) mice have reduced tissue regeneration compared with wildtype (WT) mice.  
33 Further, proliferation of neural progenitor cells and microglial activation were impaired after  
34 HI. Transcriptome analysis showed a strong transcriptional response to HI in the  
35 subventricular zone of WT mice involving about 7300 genes. In contrast, the HCAR1 KO  
36 mice showed a very modest response to HI, involving about 750 genes. Notably, fundamental  
37 processes involved in tissue repair such as cell cycle and innate immunity were dysregulated  
38 in HCAR1 KO. Taken together, our data suggest that HCAR1 is a key transcriptional  
39 regulator of the pathways that promote tissue regeneration after HI. Thus, HCAR1 could be a  
40 promising therapeutic target in the treatment of neonatal HI and other forms of brain  
41 ischemia.

42

43 **Key words:** Lactate, HCAR1, HCA1, GPR81, ischemia, neonatal hypoxia-ischemia,  
44 neurogenesis, microglia

45

## 46 **Introduction**

47 Cerebral hypoxia-ischemia (HI) affects around 1.5 per 1000 live born births in the developed  
48 countries<sup>1</sup>. It is characterised by an insufficient supply of blood and oxygen to the brain,  
49 leading to cell death and brain tissue damage. Hypothermia is the mainstay of today's  
50 treatment<sup>2</sup>, but a high percentage of survivors still experience long-term neurological effects,  
51 including cerebral palsy, epilepsy and cognitive disabilities<sup>3</sup>. Following a hypoxic-ischemic  
52 event, the neonatal brain has the ability to partly regenerate<sup>4</sup>. This process of brain tissue  
53 regeneration requires a coordinated increase in microglia-induced inflammation, stem cell  
54 proliferation and angiogenesis. After the acute phase of cerebral HI, debris from dead cells  
55 activates microglia, the resident immune cells of the brain. These cells have the ability to

56 remove cell debris by phagocytosis and release factors that stimulate tissue repair<sup>5</sup>. At the  
57 same time, the hypoxic-ischemic event leads to the release of various growth factors, which  
58 stimulate proliferation of neural stem- and progenitor cells<sup>4</sup> as well as angiogenesis<sup>4,6</sup>. In  
59 mammals, the majority of stem- and progenitor cells are located in two proliferating areas of  
60 the brain, namely the subventricular zone, which is located adjacent to the lateral ventricles,  
61 and the dentate gyrus of the hippocampus. Proliferating cells migrate from these areas to  
62 repopulate the damaged tissue. Targeting these areas is therefore a potential strategy to  
63 stimulate repair processes after an ischemic insult.

64 Recent studies in mice have shown improved recovery after neonatal HI by administration of  
65 lactate<sup>7,8</sup>, but the underlying mechanisms for this beneficial effect are unclear. It is unknown  
66 whether lactate improves recovery by giving metabolic support to the cells or by signalling  
67 via the Hydroxycarboxylic acid receptor 1 (HCAR1), or both.

68 HCAR1 is a G<sub>i</sub>-protein coupled receptor. It was first described in adipose tissue where it  
69 inhibits lipolysis through lowering of cyclic adenine monophosphate (cAMP)<sup>9</sup>. In the brain,  
70 HCAR1 activation can modulate neuronal firing rates in vitro<sup>10</sup> and stimulate brain  
71 angiogenesis in vivo<sup>11</sup>. Until now, a role of HCAR1 in tissue protection or repair after  
72 ischemia has not been demonstrated, although studies from different cell lines suggest that it  
73 may regulate cell proliferation and differentiation<sup>12,13</sup>.

74 Here we investigate the role of HCAR1 in neonatal HI in mice. We show that HCAR1  
75 knockout (KO) mice have a reduced ability to regenerate brain tissue after HI. By  
76 examination of neurosphere cultures in vitro and immunohistochemical staining of brain  
77 tissue after HI, we find that HCAR1 KO mice display impaired proliferation of neural stem-  
78 progenitor cells and microglia. In addition, we find that microglia are less activated.  
79 Transcriptome analysis revealed that subventricular zones from HCAR1 KO mice have an  
80 almost complete lack of transcriptional response to HI. This was specific to the subventricular  
81 zone as hippocampal samples from HCAR1 KO mice responded similar to that of WT mice.  
82 Thus, HCAR1 is a crucial transcriptional regulator of tissue response to ischemia in the  
83 subventricular zone. HCAR1 could therefore be targeted to promote tissue repair after HI.

84

85

86

## 87 **Materials and methods**

### 88 **Animals**

89 HCAR1 KO and C57Bl/6N (WT) mice were used for this study. The HCAR1 KO line was a  
90 gift from Prof. Dr Stefan Offermanns, Max Planck Institute for Heart and Lung Research, Bad  
91 Nauheim, Germany and has been described previously<sup>9</sup>. The KO line was maintained in  
92 C57Bl/6N background, and genotypes were determined by PCR analysis with DNA samples  
93 extracted from mouse ears. All mice were housed in a climate-controlled environment on a  
94 12h light/dark cycle with free access to rodent food and water. All efforts were made to  
95 reduce the number of animals used in experiments. Both females and males were included in  
96 the analyses. The mice were treated in accordance with the national and regional ethical  
97 guidelines and the European Union's Directive 86/609/EEC. Experiments were performed by  
98 FELASA-certified personnel and approved by the Norwegian Animal Research Authority.

### 99 **Mouse model for cerebral HI**

100 Cerebral hypoxia and ischemia (HI) was produced in P9 mice by permanent occlusion of the  
101 left common carotid artery (CCA) followed by systemic hypoxia, as previously described<sup>14</sup>.  
102 In brief, pups were anaesthetised with isoflurane (4% induction in chamber, 2.5%  
103 maintenance on mask in a 2:1 mixture of ambient air and oxygen), and a skin incision was  
104 made in the anterior midline of the neck. The left CCA was exposed by blunt dissection and  
105 carefully separated from adjacent tissue. A needle was placed the CAA, and a monopolar  
106 cauteriser (Hyfrecator 2000; ConMed) at a power setting of 4.0 W was used to  
107 electrocoagulate the artery. The neck incision was closed with absorbable sutures (Safil 8–0  
108 DRM6; B. Braun Melsungen AG). The surgical procedure was completed within 5 min. After  
109 a recovery period of 1–2 h, the pups were exposed to a hypoxic (10% oxygen balance  
110 nitrogen; Yara), humidified atmosphere for 60 min at 36.0 °C. The pups were returned to their  
111 dam and after 6 hours, 24 hours or 42 days brains were retrieved and prepared for  
112 immunohistochemistry, cell culture experiments, or RNA sequencing.

### 113 **Measurement of acute tissue damage and long-term tissue loss**

114 Mice were terminated by neck dislocation 24 h or 42 d after HI. Brains were removed from  
115 the skull and freed from dura mater and vascular tissue before being transferred to a precooled  
116 brain mould immersed in ice-cold PBS. 1 mm coronal slices were cut using an adult brain  
117 slicer (51-4984; Zivic Instruments, Pittsburgh, PA, USA). For measurement of acute tissue

118 damage, sections were soaked in 2% TTC (T8877, Sigma) in PBS for 30 min at room  
119 temperature and subsequently fixed in 4% paraformaldehyde (PFA, Sigma-Aldrich, St. Louis,  
120 MO, USA; 15,812-7) in PBS at 4°C for 1 hour. Photos were captured with a digital camera  
121 (Nikon D80), and pictures were analysed using image J software (NIH, San Francisco, CA,  
122 USA). Quantification of acute tissue damage/infarct size was carried out as previously  
123 described<sup>31</sup>. Briefly, the infarct area was calculated by subtracting the area of undamaged,  
124 TTC positive tissue in the ipsilateral hemisphere from that of the intact contralateral  
125 hemisphere, thereby correcting for brain oedema. The relative size of the damage was  
126 expressed as per cent of the contralateral hemisphere. Total volume loss, as well as tissue loss  
127 within specific brain structures, was calculated by modified Cavalieri's principle, using the  
128 formula  $V = \sum APt$  where V is the total volume,  $\sum A$  is the sum of the areas measured, P is the  
129 inverse of the section sampling fraction and t is the section thickness. For measurement of  
130 long-term tissue loss 42 days after HI, coronal sections were prepared as described above, but  
131 without TTC staining. Sections were fixed in 4% paraformaldehyde (PFA) in PBS for  
132 30 min, and 10% formalin for 24 h and photos were taken. Tissue loss was calculated by  
133 subtracting the total volume, section volume or structure volume of the ipsilateral hemisphere  
134 from that of the contralateral hemisphere. One brain (HCAR1 KO) was excluded from the  
135 analysis due to so excessive damage that the sections fell apart, thus making measurements  
136 difficult. The person performing measurements was blinded to genotype during the  
137 measurements.

### 138 **Neurosphere cultures and assays**

139 Neurospheres derived from forebrains of C57BL/6 and C57BL/6 HCAR1 knockout mice at  
140 postnatal day 3 were generated and propagated as previously described with modifications<sup>32</sup>.  
141 Briefly, dissected brain tissues were finely minced and cultured with proliferation medium of  
142 DMEM/F12 (Invitrogen) supplemented with 2 mM glutaMax, 20 ng/ml EGF (R&D Systems),  
143 10 ng/ml bFGF (R&D Systems), N2 supplement (ThermoFisher Scientific), B27 supplement  
144 without vitamin A (ThermoFisher Scientific), and penicillin/streptomycin. Under the  
145 proliferating condition, cells were grown as free-floating neurospheres. After 7 days in  
146 culture, cells in primary neurospheres were trypsinised with trypsin-EDTA (Invitrogen),  
147 dissociated mechanically, and placed onto 75 cm<sup>2</sup> flasks and the neurospheres were passaged  
148 every 7 days. For neurosphere self-renewal, dissociated single NSPCs were plated at a density  
149 of  $1.0 \times 10^4$  per well onto 6-well suspension plates with proliferation medium. After 10  
150 days in culture, images of the entire well were captured with EVOS microscope. The pictures

151 were analysed using the ImageJ software to obtain the total number and average size of  
152 neurospheres per well. For the neurosphere differentiation, dissociated single NSPCs were  
153 plated at a density of  $5 \times 10^4$  cells per centimetre square onto tissue culture plates pre-coated  
154 with poly-D-lysine (Sigma). Cells were cultured in differentiation medium (proliferation  
155 medium minus EGF and bFGF) for 5 days with half medium changes daily, and the cells were  
156 fixed at different time points for further experiments.

### 157 **Immunocytochemistry and quantification of neurospheres**

158 Immunocytochemistry was performed as described previously<sup>32</sup>. Differentiated NSPCs were  
159 fixed with 4% paraformaldehyde and treated with 0.1% Triton X-100/PBS. Following  
160 blocking with 5% BSA, 5% goat serum, and 0.1 Triton X-100 in PBS for 30 min, the cells  
161 were incubated with monoclonal anti-neuron-specific beta-III tubulin (Tuj-1, MAB1195 R&D  
162 Systems), rabbit polyclonal astrocyte-specific anti-gial fibrillary acidic protein (GFAP,  
163 Z0334 Dako) in PBS containing 0.5% BSA, 0.5% goat serum, and 0.1% Tween 20 at 4°C  
164 overnight. Then the cells were incubated with fluorescent anti-mouse or rabbit secondary  
165 antibody (Alexa 594 and Alexa 488, Molecular Probes). The nuclear dye 4',6-diamidino-2-  
166 phenylindole (DAPI) at 1 l ng/ml (Molecular Probes) was added to visualise all cells. To  
167 obtain the percentage of each cell type, 4000 –5000 cells that were morphologically identified  
168 in 10 random fields from two different cultures were counted under a 10x objective.  
169 Percentage of positive cells was calculated in relation to the total number of cells, as detected  
170 by DAPI nuclear staining.

### 171 **BrdU incorporation in mice**

172 For the BrdU experiments, we injected 0.1 □ mg/g of BrdU into the peritoneum at day 4 to 7  
173 after hypoxic ischemia at 24-h intervals. Animals were transcardially perfused 2 □ h after the  
174 last injection and brains were fixed and stained as described below.

### 175 **Preparation of mouse tissue and immunolabelling**

176 Mice were anaesthetised with a cocktail consisting of Zoletil Forte (Virbac International,  
177 Carros Cedex, France), Rompun (Bayer Animal Health GmbH, Leverkusen, Germany) and  
178 Leptanal (Janssen-Cilag International NV, Beerse, Belgium). Mice were then transcardially  
179 perfused with 4% PFA. Brains were then removed and stored in 4% PFA for 24 □ h, and then  
180 immersion fixed in 10% formalin until paraffin embedding. We then cut 6-8-□m-thick coronal  
181 sections through the entire forebrain using a microtome (ThermoScientific, Waltham, MA,

182 USA). For immunostaining, sections were heated in an incubator at 60°C for 30 min.  
183 Deparaffinisation/dehydration was performed by immersing in Neoclear (2x 5 min, Millipore,  
184 Darmstadt, Germany) followed by rehydration in an EtOH gradient (100% 2 x 5 min; 96%  
185 5 min and 70% 5 min) and then transferred to MQ H<sub>2</sub>O. Sections were then incubated at  
186 100°C in citrate antigen retrieval buffer (pH 6.0) for 20 min using a coverslip-paperclip  
187 method described by Vinod et al<sup>33</sup>. Following antigen retrieval, slides were incubated in  
188 blocking solution (10% normal goat serum, 1% bovine serum albumin, 0.5% Triton X-100 in  
189 PBS) for 1 h. Primary antibody incubation was done at room temperature overnight. Primary  
190 and secondary antibodies were diluted in a solution containing 3% normal goat serum, 1%  
191 bovine serum albumin, 0.5% Triton X-100 in PBS. The next day, sections were washed 3 x 10  
192 min in PBS and then incubated with secondary antibodies for 1h at room temperature before a  
193 new wash of 2 x 10 min in PBS and a third incubation with DAPI for 15 minutes. Sections  
194 were rewashed (3 x 10 min) before being mounted with ProLong<sup>TM</sup> Glass Antifade  
195 Mountant (Fisher Scientific, Waltham, Massachusetts). Cover glass thickness was 0.13-0.17  
196 mm. Primary antibodies were rat anti-BrdU (AB6326 Abcam, 1:200), guinea pig anti-  
197 Doublecortin (AB2253 Abcam, 1:500), rabbit anti-Ki67 (ab15580 Abcam) and rabbit anti-  
198 Iba1 (019-19741 Wako, 1:500). Secondary antibodies used were Alexa 488 goat anti-rabbit,  
199 Alexa 555 goat anti-rat, Alexa goat anti-guinea pig (all diluted 1:400).

## 200 **Analysis of immunolabelling**

201 Images were captured on a Leica SP8 confocal microscope, using a 20x objective (n.a. 0.75,  
202 microglia experiments) and a 40x oil-immersion objective (n.a. 1.3, DCX experiments). All  
203 image analysis was done in Fiji ImageJ. Before analysing, Z-stacks were flattened with  
204 maximum z-projection. For the doublecortin analysis (Fig. 2), we analysed four images per  
205 hemisphere from two different sections. The subventricular zone was defined as the area  
206 within 0-50 µm from the ependyma and the intermediate zone as 50-200 µm. We counted  
207 cells manually using the Cell Counter plugin in Fiji Image J with operators blinded during  
208 imaging and analysis. In the microglial experiments, the blinded operators defined the  
209 ischemic core and peri-infarct zone by the morphological appearance of microglia, cell-cores  
210 and general cyto-architectural integrity. In the microglia analysis (Fig. 3), we used the  
211 WEKA-segmentation computer learning algorithm<sup>34</sup> for image segmentation. After computer  
212 training, the images were automatically segmented using the trained algorithms (model files  
213 available at request to authors). The cells were then analysed automatically utilising the  
214 Analyze Particle tool with scripts written in ImageJ (Scripts available at request to authors). In

215 the microglia experiment, we analysed two images per hemisphere from two different  
216 sections. For microglia counting, we counted Iba1+ overlapping with DAPI+ objects, and  
217 then triple overlap with BrdU for counting of newly made microglia. Based on previous  
218 literature on microglia morphology during cerebral ischemia<sup>19</sup>, we selected the average  
219 maximum branch length and microglial cross-sectional size as data for activated microglia  
220 morphology analyses. For the branch and size analyses, we excluded processes protruding  
221 from out of focus microglia by only analysing Iba1+ objects above 95um<sup>2</sup>. Branches were  
222 analysed using the skeletonise (2D/3D) and analyse skeleton (2D/3D) functions in ImageJ.

### 223 **RNA sequencing and analysis**

224 Subventricular zone tissue was dissected from the ipsilateral (damaged) and contralateral  
225 (undamaged) hemisphere of mice 3 days after HI. The samples were snap-frozen in liquid N<sub>2</sub>  
226 and stored at -80°C before RNA isolation. RNA isolation was performed using QIAGEN  
227 allprep kit, and final RNA was dissolved in MQ H<sub>2</sub>O and stored at -80°C. Paired-end  
228 sequencing was performed with the Illumina platform by BGI Tech Solutions (Hong Kong).  
229 The quality control of fastq files was performed with FastQC v0.11.9<sup>35</sup>. Alignment to  
230 reference genome (GRCm38) was accomplished with hisat2 v2.1.0<sup>36</sup> while annotation and  
231 count matrix was completed with featureCounts v.2.0.0<sup>37</sup>. We performed downstream DEGs  
232 analysis in R v3.6.1 with DESeq2 v1.24.0<sup>38</sup>. GSEA (Gene Set Enrichment Analysis) was done  
233 with WebGestalt<sup>39</sup>. Heat maps were generated in R v3.6.1 with heatmap3 v1.1.7<sup>40</sup>.

### 234 **Statistical Analysis**

235 P-values in Fig. 1 and Fig 2G-I are from unpaired, two-tailed, t-test's. In Fig. 2O-R and Fig.  
236 3 we used the Šídak (Šídak-Bonferroni)<sup>41</sup> method for multiple comparisons of selected groups  
237 (WT-contra vs KO-contra, WT-ipsi vs KO-ipsi, WT-contra vs WT-ipsi, and KO-contra vs  
238 KO-ipsi. Analyses were performed in Prism. Degrees of freedom are written as df in the  
239 results. All error bars represent the standard deviation. In Fig. 2 O-R and Fig. 3, there are no  
240 error-bars as all the individual data points are shown in the graphs. All experimental units  
241 were included in the analyses (none were excluded), unless otherwise stated.

### 242 **Data availability**

243 The data that support the findings of this study as well as the algorithms used for analyses are  
244 available from the corresponding author upon request.



245

## 246 **Results**

### 247 **HCAR1 is required for brain tissue regeneration after HI**

248 To investigate the role of HCAR1 in stress-induced neuronal injury and subsequent  
249 neurogenesis, we induced HI in 9 days old HCAR1 KO and wild-type (WT) mice. We used  
250 a model for cerebral HI that includes permanent occlusion of the left common carotid  
251 artery followed by systemic hypoxia<sup>14</sup>. This leads to a detectable histological injury in the  
252 cortex, hippocampus, striatum, and thalamus of the left hemisphere, whereas the  
253 contralateral hemisphere is indistinguishable from a sham-treated brain, constituting a  
254 morphologically accurate internal control<sup>14</sup>. After HI, we examined acute brain tissue  
255 damage and long-term tissue loss. We assessed acute brain tissue damage by 2,3,5-  
256 Triphenyltetrazolium chloride (TTC) staining. HCAR1 KO and WT mice showed  
257 comprehensive damage in the affected ipsilateral hemisphere 24 hours after HI, with an  
258 average TTC-negative (i.e. damaged) volume in the ipsilateral relative to the contralateral  
259 side of  $34 \pm 22\%$  in WT and  $47 \pm 14\%$  in HCAR1 KO. There was no significant difference  
260 between HCAR1 KO and WT mice in total acute tissue damage ( $p=0.19$ ,  $n=14$   
261 mice/genotype. Fig. 1A-B). When comparing the damage in individual sub-sections of the  
262 brain, we detected increased damage in HCAR1 KO mice in sections 4 mm from the  
263 frontal pole (WT  $28 \pm 27\%$ ; KO  $46 \pm 23\%$ ,  $p=0.046$ ), but no difference between HCAR1  
264 KO and WT in other sub-sections (Fig. 1C). Thus, overall there was little difference in  
265 acute tissue damage between HCAR1 KO and WT.

266 After the acute phase of HI, there is a phase of neurogenesis and tissue repair. To assess a  
267 potential role for HCAR1 in tissue repair, we measured tissue loss 42 days after HI. At this  
268 time point the repair process is completed and the long-term damage can be observed as a  
269 loss of brain tissue<sup>14</sup>. WT mice showed partial restoration of damaged brain structures with  
270 a tissue loss of  $17 \pm 9\%$  (Fig. 1D-E). In comparison, HCAR1 KO mice showed  
271 significantly more tissue deficit with a permanent tissue loss of  $31 \pm 10\%$ , i.e. 82% higher  
272 than in WT mice (Fig. 1D-E,  $p<0.0001$  WT  $n=22$ , KO  $n=20$ ). Measurements of tissue loss  
273 in individual sub-sections of the brain showed that all quantified sections (of which  
274 hippocampus, thalamus and striatum are included) had significantly lower regeneration in  
275 HCAR1 KO compared with WT (Fig. 1 F, 2 mm from pole WT  $18 \pm 10\%$ , KO  $27 \pm 11\%$ ,  
276  $p=0.007$ ; 3 mm from pole WT  $18 \pm 9$ , KO  $34 \pm 12$ ,  $p<0.0001$ , 4 mm from pole WT  $18 \pm$

277 12, KO  $35 \pm 14$ ,  $p=0.0001$ , 5 mm from pole WT  $17 \pm 11$ , KO  $35 \pm 12$ ,  $p<0.0001$ , 6 mm  
278 from pole WT  $14 \pm 10$ , KO  $31 \pm 13$ ,  $p<0.0001$ , 7 mm from pole WT  $12 \pm 7$ , KO  $22 \pm 10$ ,  
279  $p<0.007$ ,  $n =$  at least 19 mice/genotype for 2-6 mm from pole and at least 10 mice/genotype  
280 for 7 mm from pole). In sum, mice lacking HCAR1 showed a significant deficit in  
281 regenerated tissue compared with WT mice, suggesting that HCAR1 is important for  
282 induced neurogenesis and tissue repair after HI.

### 283 **Impaired proliferation of neural progenitor cells in HCAR1 KO mice**

284 Tissue repair after an ischemic injury is aided by an increase in proliferation and  
285 differentiation of neural stem- and progenitor cells (NSPCs)<sup>15,16</sup>. To test the effect of HCAR1  
286 on NSPC proliferation and cell fate, we performed a neurosphere assay on spheres derived  
287 from forebrains of HCAR1 KO and WT mice. We found that neurospheres from HCAR1 KO  
288 mice developed fewer colonies compared with neurospheres from WT mice (Fig. 2A-B, G, no  
289 of colonies per well WT  $178 \pm 23$ ; KO  $132 \pm 10$ ,  $p = 0.034$ ,  $df 4$ ,  $n = 3$  clones/genotype). The  
290 average size of HCAR1 KO spheres also tended to be smaller, although this was not  
291 statistically significant (Fig. 2A-B, H, sphere area WT  $289 \pm 13 \mu\text{m}^2$ ; KO  $250 \pm 21 \mu\text{m}^2$ ,  $p =$   
292  $0.053$ ,  $df 4$ ,  $n = 3$  clones/genotype). These results indicate that HCAR1 KO NSPCs have a  
293 lower self-renewal and proliferation rate. To examine the ability of the NSPCs to differentiate,  
294 the neurospheres were dissociated, and the NSPCs were cultured in differentiation medium  
295 for five days and immunolabelled for neurons and astrocytes. Both cell types were present  
296 after differentiation. However, HCAR1 KO cells had a lower percentage of Tuj1+ neurons  
297 compared with WT cells (Fig. 2 C-D, I, WT Tuj1  $28 \pm 2 \%$ ; KO Tuj1  $19 \pm 2 \%$ ,  $p < 0.001$ ,  $df$   
298  $12$ ,  $n=4$  clones/genotype), whereas the percentage of GFAP+ astrocytes was not significantly  
299 different between the two genotypes (Fig. 2 E-F, I, WT GFAP  $18 \pm 3 \%$ ; KO GFAP  $22 \pm 3 \%$ ,  
300  $p = 0.08$ ,  $df 12$ ,  $n= 4$  clones/genotype). This suggests that HCAR1 directs stem cells towards a  
301 neuronal fate.

302 As the neurosphere data suggested impaired proliferation of NSPCs, we then examined *in*  
303 *vivo* cell proliferation after HI in HCAR1 KO and WT mice. Mice were injected with the  
304 proliferation marker Bromodeoxyuridine (BrdU) on days 4-7 after HI and were sacrificed on  
305 day 7. The number of BrdU+ cells was assessed by immunohistochemistry on brain sections.  
306 We focused on the subventricular zone and the adjacent intermediate zone as these are  
307 proliferative areas that contain a large portion of neuronal progenitor cells<sup>4</sup>. In the  
308 intermediate zone, the total number of cells was increased by 63% in the affected ipsilateral

309 hemisphere compared with the contralateral hemisphere in WT mice (Fig. 2K-O, DAPI+  
310 cells/0.01 mm<sup>2</sup>: contra 29.4 ± 3.8, ipsi 47.8 ± 4.0, p=0.001, df 9, n=5). WT mice also had a  
311 significant increase in the number of newly proliferated BrdU+ cells on the ipsilateral side  
312 (Fig. 2K-N, P, BrdU+ cells/0.01 mm<sup>2</sup>: contra 2.7 ± 0.3, ipsi 9.5 ± 1.5, p=0.001, df 9, n=3). In  
313 KO mice, however, there was no change in the total number of cells or the number of newly  
314 proliferated cells in the ipsilateral compared with contralateral side Fig. 2K-P, KO DAPI+  
315 cells/0.01 mm<sup>2</sup>: contra 35.1 ± 9.0, ipsi 32.45 ± 5.8, p=0.66, df 9, n=6. BrdU+ cells/0.01 mm<sup>2</sup>:  
316 contra 4.75 ± 1.8, ipsi 4.6 ± 1.3, p=0.97, df 9, n=4). Thus, in line with the neurosphere data, it  
317 appears that HCAR1 KO mice are unable to induce cell proliferation after HI. We then looked  
318 at neural progenitor cell proliferation. The number of neural progenitor cells positive for the  
319 marker doublecortin (DCX) were strongly increased in the ipsilateral side after HI in WT, but  
320 did not have a statistically significant increase in HCAR1 KO mice (Fig. 2K-N, Q. DCX+  
321 cells/0.01mm<sup>2</sup>: WT contra 1.0 ± 0.3, ipsi 4.7 ± 2.0, p=0.001, df 9, n=5. KO contra 1.2 ± 0.9,  
322 ipsi 2.3 ± 1.2, p=0.21, df 9, n=6). Further, the number of newly proliferated DCX+ cells  
323 increased on the ipsilateral side in WT but not in KO (Fig. 2K-N, R. DCX+ and Ki67+ (n=2)  
324 or BrdU+ (n=3 WT and 4 KO) cells/0.01 mm<sup>2</sup>: WT contra 0.30 ± 0.15, ipsi 0.70 ± 0.28,  
325 p=0.03, df 9. KO contra 0.43 ± 0.40, ipsi 0.34 ± 0.10, p=0.74, df 9, n=5 WT and 6 KO). A  
326 similar trend with fewer progenitor cells after HI in HCAR1 KO compared with WT was seen  
327 in the subventricular zone, although here there was large variation between samples, possibly  
328 due to the small size of this region (Supplementary Fig. 1). In conclusion, these data show that  
329 HCAR1 KO mice fail to increase proliferation of neural progenitor cells after HI, suggesting  
330 that HCAR1 is required to stimulate neural cell proliferation to induce tissue repair after  
331 ischemic damage.

### 332 **Impaired microglial proliferation and activation in HCAR1 KO mice after HI**

333 After cerebral HI, microglia are recruited to the injured site at which they remove debris from  
334 dead cells to facilitate the repair process<sup>17</sup>. This requires increased proliferation, activation  
335 and migration of the microglia<sup>17,18</sup>. We used immunohistochemistry to assess the proliferation  
336 and activation of microglia in the area surrounding the infarct (the peri-infarct zone). As  
337 expected, WT mice had a strong increase in proliferating microglia in the ipsilateral  
338 hemisphere when compared with the contralateral side. However, no increase was detected in  
339 HCAR1 KO mice (Fig. 3A-D, F. IBA1+ BrdU+ cells/mm<sup>2</sup>: WT contra 45.4 ± 21.7, ipsi 123.2  
340 ± 90.0, p=0.01, df 26, n=8. KO contra 45.5 ± 21.5, ipsi 50.4 ± 27.8, p=0.98, df 26, n=7.).  
341 Further, the total number of microglia was increased in the ipsilateral side in WT, but not

342 significantly in HCAR1 KO mice (Fig. 3A-D, E. IBA1+ cells/mm<sup>2</sup>: WT contra 156.0 ± 43.3,  
343 ipsi 337.5 ± 178.2, p=0.002, df 16, n=8. KO contra 121.8 ± 57.0, ipsi 214.0 ± 57.0, p=0.074,  
344 df 16, n=10. ). We then assessed the activation of microglia. Activated microglia have larger  
345 cell soma and are less ramified (i.e. they have shorter and fewer branches)<sup>19</sup>. In WT mice,  
346 microglia in the ipsilateral hemisphere had larger somata and were less ramified than in the  
347 contralateral side, indicating an activated phenotype (Fig. 3A-B, G-H. Cross-sectional area,  
348 μm<sup>2</sup>: WT contra 152.0 ± 22.8, ipsi 176.5 ± 17.5, p=0.02, df 16, n=8. Ramification (avg. max  
349 branch length, μm): WT contra 17.8.1 ± 1.7, ipsi 16.1 ± 0.9, p=0.01, df 15. n=7. Surprisingly,  
350 no significant changes in the cell soma size and ramification of microglia were observed in  
351 HCAR1 KO mice (Fig. 3C-D, G-H, cross-sectional area, μm<sup>2</sup>: KO contra 148.1 ± 14.0, ipsi  
352 158.2 ± 23.3, p=0.37, df 16, n=10. Ramification (Avg. max branch length, μm): KO contra  
353 17.0 ± 2.1, ipsi 16.3 ± 1.5, p=0.36, df 15, n=10), indicating that microglia activation is not  
354 induced by HI. In sum, HCAR1 KO mice were unable to induce microglia proliferation and  
355 activation in response to HI, indicating a role for HCAR1 in these processes.

#### 356 **Weak transcriptional response to HI in the subventricular zone of HCAR1 KO mice**

357 To investigate the mechanisms underlying HCAR1 involvement in brain tissue regeneration,  
358 we performed a genome-wide transcriptome analysis by RNA sequencing of the  
359 subventricular region from the affected ipsilateral and contralateral (control) hemispheres of  
360 mice after cerebral HI. Principal component analysis (PCA, Fig. 4A) showed that tissue  
361 samples from the ipsilateral hemisphere of WT mice clustered away from the contralateral  
362 samples (i.e. they showed a different gene expression profile), indicating a strong  
363 transcriptional response to HI. Samples from the contralateral hemisphere of HCAR1 KO  
364 mice had a comparable gene expression pattern to WT contralateral samples. Notably,  
365 ipsilateral HCAR1 KO samples also clustered close together with WT and KO contralateral  
366 samples. Thus, it appears that the transcriptional response to HI in the subventricular zone of  
367 HCAR1 KO is severely impaired. The number of differentially expressed genes (DEGs)  
368 between the different experimental groups further reflected an inadequate response in HCAR1  
369 KO (Supplementary table 1): while the WT ipsilateral hemisphere had 7332 DEGs when  
370 compared with WT contralateral hemisphere, indicating a distinct response to HI, only 752  
371 DEGs were detected between HCAR1 KO ipsilateral and contralateral hemispheres. Further,  
372 when comparing WT contralateral with HCAR1 KO contralateral hemisphere, only 11 DEGs  
373 were identified, whereas WT ipsilateral versus KO ipsilateral identified 6640 DEGs.  
374 Therefore, in the undamaged contralateral side, WT and HCAR1 KO showed a similar gene

375 expression profile, while HI induced a large gene expression response in WT that was  
376 strongly reduced in HCAR1 KO. To investigate whether the deficient transcriptional response  
377 to HI was specific to the subventricular zone, we performed a similar RNA sequencing  
378 analysis of the ipsilateral and contralateral hippocampi from the same mice. Surprisingly, in  
379 the hippocampal samples, PCA analysis showed a close clustering of HCAR1 KO and WT  
380 samples after HI (Supplementary Fig. 6), indicating a similar transcriptional response to HI.  
381 In line with this, we only identified 37 DEGs when comparing HCAR1 KO with WT  
382 hippocampi after HI (Supplementary table 1). This indicates that HCAR1 acts as a key  
383 transcriptional regulator of ischemia response in the subventricular zone but not in the  
384 hippocampus.

385 We then performed gene set enrichment analysis of the subventricular zone samples to  
386 identify differentially regulated pathways between the two genotypes in this area. Several  
387 pathways were differentially expressed in HCAR1 KO ipsi versus WT ipsi (Fig. 4B. For  
388 extensive maps of differentially regulated pathways between all experimental groups, see  
389 Supplementary figures 2-5). Of particular interest to our previous findings, we found the cell  
390 cycle pathway strongly down-regulated in HCAR1 KO. Furthermore, the P53 pathway, a  
391 well-known regulator of the cell cycle, was also down-regulated. The relative expression of  
392 differentially regulated cell cycle genes across the four different experimental groups is  
393 shown in Fig. 4C. The downregulation of cell cycle genes in HCAR1 KO compared with WT  
394 may explain the differences in neural differentiation and the deficient cell proliferation in  
395 HCAR1 KO after HI (Fig. 2).

396 The complement and coagulation cascade pathways were down-regulated in the ipsilateral  
397 hemisphere of HCAR1 KO (Fig. 4B, D) compared with WT mice. This is of particular  
398 interest in light of the diminished microglia response in HCAR1 KO as the complement  
399 system is involved in microglia activation<sup>20,21</sup>. A high number of markers for activated  
400 microglia were also down-regulated in HCAR1 KO vs WT after HI (Fig. 4E), also in line with  
401 the impaired microglia activation observed by immunostaining (Fig. 3). In sum, the  
402 subventricular zones of HCAR1 KO mice display a strongly impaired transcriptional response  
403 to HI. This can explain the impaired cell proliferation and microglia activation after HI,  
404 suggesting that HCAR1 is a key transcriptional regulator of tissue repair after ischemia.

405

406

## 407 **Discussion**

408 We report that HCAR1 KO mice have a substantial deficit in the restoration of brain tissue  
409 after HI, indicating that lactate receptor HCAR1 plays a crucial role in the processes that lead  
410 to tissue repair. Since no exogenous lactate was administered in our experiments, the observed  
411 effect must be due to endogenous lactate or possible baseline receptor activity. Indeed, the  
412 lactate level rises after a hypoxic-ischemic episode<sup>22,23</sup>. It is likely that administration of  
413 lactate could further leverage the effect of HCAR1: two recent studies showed that mouse  
414 pups injected with lactate before, or in the hours or days following HI had improved  
415 recovery<sup>7,8</sup>. The authors suggested that the protective effect of lactate was mainly due to  
416 lactate being used as a metabolite to make ATP<sup>7,8</sup>. However, our data suggest that recovery  
417 after lactate injection is partly mediated by HCAR1, which promotes a stronger transcriptional  
418 response to HI and thereby facilitates neurogenesis and tissue regeneration after injury. On the  
419 other hand, these studies also showed an effect of lactate injections on acute infarct volume.  
420 Therefore, a putative explanation is that lactate injected before or immediately after HI  
421 reduces lesion size by mainly working as a metabolite, whereas lactate injected at a later time  
422 point in large works via HCAR1. Lactate injections can also be protective after ischemic  
423 stroke in adult mice<sup>24-27</sup>. Here, it also seems to be a combination of metabolic and HCAR1-  
424 dependent effects since replacing lactate with either the HCAR1 receptor agonist 3,5-  
425 dihydroxybenzoic acid (3, 5 DHBA) or the metabolic substrate pyruvate offered partial  
426 protection<sup>24</sup>.

427 An ischemic event will induce a significant transcriptional response<sup>28</sup>. By RNA sequencing of  
428 tissue samples from the subventricular zone, we found that HCAR1 KO mice displayed a  
429 weak transcriptional response to HI, with a 90% reduction in DEGs compared with WT mice.  
430 Hence, HCAR1 appears to be essential for the induction of the transcriptional response to HI.  
431 This HCAR1 dependence is specific for the subventricular zone, since hippocampal samples  
432 showed very moderate differences between WT and HCAR1 KO mice in the transcriptional  
433 profile after HI.

434 An essential part of the repair process after a neonatal brain injury is the generation of new  
435 cells. This occurs by increased proliferation and differentiation of stem cells and involves  
436 upregulation of genes involved in the cell cycle pathway<sup>29,30</sup>. By use of neurosphere assays,  
437 we showed that neurospheres lacking HCAR1 had reduced proliferation ability. Moreover,  
438 while WT mice more than doubled the number of proliferating cells after HI, HCAR1 KO

439 mice were unable to increase cell proliferation (Fig. 2P). In line with this, transcriptome  
440 analysis revealed that the cell cycle genes were strongly upregulated after HI in WT, but not  
441 in HCAR1 KO mice. Hence, it seems that HCAR1 can act as a transcriptional regulator of cell  
442 cycle genes, thereby controlling cell proliferation. A role of HCAR1 in cell proliferation was  
443 previously shown in cancer and osteoblast cell lines<sup>12,13</sup>. A very recent paper also showed  
444 HCAR1 dependent neurogenesis after high intensity physical exercise<sup>43</sup>. Similar to our study,  
445 this paper found neurogenesis to be HCAR1 dependent in the subventricular zone, but not in  
446 the hippocampus. Under normal conditions, however, HCAR1 may be less important as we  
447 did not detect any differences between HCAR1 KO and WT mice in the total number of cells,  
448 or proliferating cells, in the contralateral hemispheres. This was evident from the  
449 transcriptome analysis of contralateral tissue showing only moderate differences in DEGs  
450 between KO and WT.

451 Microglia carry out several vital functions in response to brain injury. These include clearance  
452 of damaged tissue, resistance to infections and restoration of tissue homeostasis<sup>5</sup>. We detected  
453 an increase in the proliferation and activation of microglia in the peri-infarct zone after HI in  
454 WT, but not in HCAR1 KO mice. The lack of microglia proliferation could be due to the  
455 reduced induction of cell cycle response, as discussed above. The absence of microglia  
456 activation was confirmed on a transcriptional level as genes associated with activated  
457 microglia were upregulated in WT but not in KO. This effect may be explained by the  
458 reduced complement system response in HCAR1 KO. Altogether, the differences in  
459 microglial data suggest that the damaging effects of HCAR1 KO in HI are due to interplay of  
460 both the immune response and proliferation and regeneration of the damaged brain cells.

461 In addition to the effects on cell cycle and microglia activation discussed above, the  
462 transcriptome analysis revealed a large number of differentially expressed genes and  
463 pathways, including genes involved in DNA repair and glutamate signalling. These processes  
464 will likely also influence the ability of the brain tissue to repair after injury.

465 Overall, our data show that HCAR1 is a key transcriptional regulator of brain tissue response  
466 to an ischemic insult. We therefore propose a model in which activation of HCAR1 by  
467 elevated lactate during and after HI stimulates a transcriptional response involving pathways  
468 responsible for tissue repair (Fig. 5). HCAR1 could be a target of future treatment for neonatal  
469 HI and possibly other forms of brain injury.

470

471 **Acknowledgements**

472 We thank Prof. Stefan Offermanns and collaborators at the Max-Planck-Institute for Heart  
473 and Lung Research, Bad Nauheim, Germany, for providing breeder HCAR1 knockout mice,  
474 Dr. Gunn Anette Hildrestrand for assistance with hypoxic-ischemic experiments and Dr.  
475 Adam Filipczyk for comments on the manuscript. Images were obtained with support from  
476 Drs. Anna Lång and Stig-Ove Bøe at the South-Eastern Health Authority Core Facility of  
477 Advanced Light Microscopy (Gaustad, Norway).

478

479 **Funding**

480 This work was supported by the South-Eastern Norway Regional Health Authority (grants  
481 2020042 and 2018050), the Norwegian Health Association (grant 4841), the Civitan  
482 Alzheimer Fund and the Medical research program at the University of Oslo.

483

484 **Competing interests**

485 The authors declare no competing interests.

486

487 **Supplementary material**

488 All supplementary material is uploaded in a separate file.

489

490 **Author contributions**

491 L.H.K., E.R.G., V.P., M.P., W.W., A.A-J., R.S., N.M., X.L. and J.E.R. performed and  
492 analysed experiments. L.H.K., E.R.G., V.P., L.H.B., M.B. and J.E.R. planned experiments  
493 and wrote the manuscript.

494

495



## 496 **References**

- 497 1. Kurinczuk, J. J., White-Koning, M. & Badawi, N. Epidemiology of neonatal  
498 encephalopathy and hypoxic-ischaemic encephalopathy. *Early Human Development* 86, 329–  
499 338 (2010).
- 500 2. Shankaran, S. et al. Childhood outcomes after hypothermia for neonatal  
501 encephalopathy. *N. Engl. J. Med.* 366, 2085–2092 (2012).
- 502 3. Douglas-Escobar, M. & Weiss, M. D. Hypoxic-Ischemic Encephalopathy A Review  
503 for the Clinician. *JAMA Pediatr.* 169, 397–403 (2015).
- 504 4. Donega, V., Van Velthoven, C. T. J., Nijboer, C. H., Kavelaars, A. & Heijnen, C. J.  
505 The endogenous regenerative capacity of the damaged newborn brain: Boosting neurogenesis  
506 with mesenchymal stem cell treatment. *Journal of Cerebral Blood Flow and Metabolism* 33,  
507 625–634 (2013).
- 508 5. Jin, X. & Yamashita, T. Microglia in central nervous system repair after injury.  
509 *Journal of Biochemistry* 159, 491–496 (2016).
- 510 6. Shweiki, D., Itin, A., Soffer, D. & Keshet, E. Vascular endothelial growth factor  
511 induced by hypoxia may mediate hypoxia-initiated angiogenesis. *Nature* 359, 843–845  
512 (1992).
- 513 7. Roumes, H. et al. Neuroprotective role of lactate in rat neonatal hypoxia-ischemia. *J.*  
514 *Cereb. Blood Flow Metab.* 0271678X2090835 (2020). doi:10.1177/0271678X20908355
- 515 8. Tassinari, I. D. et al. Lactate administration reduces brain injury and ameliorates  
516 behavioral outcomes following neonatal hypoxia-ischemia. *Neuroscience* (2020).  
517 doi:10.1016/j.neuroscience.2020.09.006
- 518 9. Ahmed, K. et al. An autocrine lactate loop mediates insulin-dependent inhibition of  
519 lipolysis through GPR81. *Cell Metab* 11, 311–319 (2010).
- 520 10. de Castro Abrantes, H. et al. The Lactate Receptor HCAR1 Modulates Neuronal  
521 Network Activity through the Activation of G $\alpha$  and G $\beta\gamma$  Subunits. *J. Neurosci.* 39, 4422–4433  
522 (2019).

- 523 11. Morland, C. et al. Exercise induces cerebral VEGF and angiogenesis via the lactate  
524 receptor HCAR1. *Nat. Commun.* 8, 15557 (2017).
- 525 12. Stäubert, C., Broom, O. J. & Nordström, A. Hydroxycarboxylic acid receptors are  
526 essential for breast cancer cells to control their lipid/fatty acid metabolism. *Oncotarget* 6,  
527 19706–19720 (2015).
- 528 13. Wu, Y. et al. Lactate enhanced the effect of parathyroid hormone on osteoblast  
529 differentiation via GPR81-PKC-Akt signaling. *Biochem. Biophys. Res. Commun.* 503, 737–  
530 743 (2018).
- 531 14. Sejersted, Y. et al. Endonuclease VIII-like 3 (Neil3) DNA glycosylase promotes  
532 neurogenesis induced by hypoxia-ischemia. *Proc. Natl. Acad. Sci.* 108, 18802–18807 (2011).
- 533 15. Mattiesen, W. R. C. et al. Increased neurogenesis after hypoxic-ischemic  
534 encephalopathy in humans is age related. *Acta Neuropathol.* 117, 525–534 (2009).
- 535 16. Lindvall, O. & Kokaia, Z. Neurogenesis following stroke affecting the adult brain.  
536 *Cold Spring Harb. Perspect. Biol.* 7, (2015).
- 537 17. Neumann, H., Kotter, M. R. & Franklin, R. J. M. Debris clearance by microglia: An  
538 essential link between degeneration and regeneration. *Brain* 132, 288–295 (2009).
- 539 18. Amat, J. A., Ishiguro, H., Nakamura, K. & Norton, W. T. Phenotypic diversity and  
540 kinetics of proliferating microglia and astrocytes following cortical stab wounds. *Glia* 16,  
541 368–382 (1996).
- 542 19. Morrison, H. W. & Filosa, J. A. A quantitative spatiotemporal analysis of microglia  
543 morphology during ischemic stroke and reperfusion. *J. Neuroinflammation* 10, 4 (2013).
- 544 20. Fumagalli, S., Perego, C., Pischiutta, F., Zanier, E. R. & De Simoni, M. G. The  
545 ischemic environment drives microglia and macrophage function. *Front. Neurol.* 6, (2015).
- 546 21. Hammad, A., Westacott, L. & Zaben, M. The role of the complement system in  
547 traumatic brain injury: A review. *Journal of Neuroinflammation* 15, 1–15 (2018).
- 548 22. Roelants-Van Rijn, A. M., van der Grond, J., de Vries, L. S. & Groenendaal, F. Value  
549 of (1)H-MRS using different echo times in neonates with cerebral hypoxia-ischemia. *Pediatr.*  
550 *Res.* 49, 356–62 (2001).

- 551 23. Zheng, Y. & Wang, X.-M. Measurement of Lactate Content and Amide Proton  
552 Transfer Values in the Basal Ganglia of a Neonatal Piglet Hypoxic-Ischemic Brain Injury  
553 Model Using MRI. *AJNR. Am. J. Neuroradiol.* 38, 827–834 (2017).
- 554 24. Castillo, X. et al. A probable dual mode of action for both L- and D-lactate  
555 neuroprotection in cerebral ischemia. *J. Cereb. Blood Flow Metab.* 35, 1561–9 (2015).
- 556 25. Berthet, C. et al. Neuroprotective role of lactate after cerebral ischemia. *J. Cereb.*  
557 *Blood Flow Metab.* 29, 1780–1789 (2009).
- 558 26. Berthet, C., Castillo, X., Magistretti, P. J. & Hirt, L. New Evidence of Neuroprotection  
559 by Lactate after Transient Focal Cerebral Ischaemia: Extended Benefit after  
560 Intracerebroventricular Injection and Efficacy of Intravenous Administration. *Cerebrovasc.*  
561 *Dis.* 34, 329–335 (2012).
- 562 27. Buscemi, L. et al. Extended preclinical investigation of lactate for neuroprotection  
563 after ischemic stroke. *Clin. Transl. Neurosci.* 4, 2514183X2090457 (2020).
- 564 28. Androvic, P. et al. Decoding the Transcriptional Response to Ischemic Stroke in  
565 Young and Aged Mouse Brain. *Cell Rep.* 31, 107777 (2020).
- 566 29. Prasad, S. S., Russell, M., Nowakowska, M., Williams, A. & Yauk, C. Gene  
567 expression analysis to identify molecular correlates of pre- and post-conditioning derived  
568 neuroprotection. *J. Mol. Neurosci.* 47, 322–339 (2012).
- 569 30. Wen, Y., Yang, S., Liu, R. & Simpkins, J. W. Cell-cycle regulators are involved in  
570 transient cerebral ischemia induced neuronal apoptosis in female rats. *FEBS Lett.* 579, 4591–  
571 4599 (2005).
- 572 31. Sejersted, Y. et al. Endonuclease VIII-like 3 (Neil3) DNA glycosylase promotes  
573 neurogenesis induced by hypoxia-ischemia. *Proc. Natl. Acad. Sci. U. S. A.* 108, 18802–18807  
574 (2011).
- 575 32. Wang, W. et al. Mitochondrial DNA integrity is essential for mitochondrial maturation  
576 during differentiation of neural stem cells. *Stem Cells* 28, 2195–2204 (2010).
- 577 33. Vinod, K. R., Jones, D. & Udupa, V. A simple and effective heat induced antigen  
578 retrieval method. *MethodsX* 3, 315–319 (2016).

- 579 34. Arganda-Carreras, I. et al. Trainable Weka Segmentation: A machine learning tool for  
580 microscopy pixel classification. *Bioinformatics* 33, 2424–2426 (2017).
- 581 35. Andrews, S. FastQC: a quality control tool for high throughput sequence data.  
582 Available at: <https://www.bioinformatics.babraham.ac.uk/projects/fastqc/>.
- 583 36. Kim, D., Langmead, B. & Salzberg, S. L. HISAT: A fast spliced aligner with low  
584 memory requirements. *Nat. Methods* 12, 357–360 (2015).
- 585 37. Liao, Y., Smyth, G. K. & Shi, W. FeatureCounts: An efficient general purpose  
586 program for assigning sequence reads to genomic features. *Bioinformatics* 30, 923–930  
587 (2014).
- 588 38. Love, M. I., Huber, W. & Anders, S. Moderated estimation of fold change and  
589 dispersion for RNA-seq data with DESeq2. *Genome Biol.* 15, (2014).
- 590 39. Liao, Y., Wang, J., Jaehnig, E. J., Shi, Z. & Zhang, B. WebGestalt 2019: gene set  
591 analysis toolkit with revamped UIs and APIs. *Nucleic Acids Res.* 47, W199–W205 (2019).
- 592 40. Zhao, S., Guo, Y., Sheng, Q. & Shyr, Y. Advanced heat map and clustering analysis  
593 using heatmap3. *Biomed Res. Int.* 2014, (2014).
- 594 41. Šidák, Z. Rectangular Confidence Regions for the Means of Multivariate Normal  
595 Distributions. *J. Am. Stat. Assoc.* 62, 626–633 (1967).
- 596 42. DePaula-Silva, A. B. et al. Differential transcriptional profiles identify microglial- and  
597 macrophage-specific gene markers expressed during virus-induced neuroinflammation.  
598 *J. Neuroinflammation* 16, 152 (2019).
- 599 43. Lambertus, M. et al. L-lactate induces neurogenesis in the mouse ventricular-  
600 subventricular zone via the lactate receptor HCA1. *Acta Physiol* e13587. doi:  
601 10.1111/apha.13587 (2020). Online ahead of print.

602

603

604

605

606 **Figure legends**

607 **Figure 1: HCAR1 does not protect the brain from acute tissue damage following**  
608 **cerebral HI, but promotes brain tissue regeneration.**

609 **a** Representative images of TTC-stained brain sections from WT and HCAR1 KO mice 24  
610 hours after HI. TTC turns red upon reacting with mitochondrial respiratory enzymes in  
611 viable tissue, whereas infarcted tissue remains white. **b** Brain infarct size (TTC-negative  
612 tissue as percentage of total quantified tissue volume) 24 hours after HI. **c** Percentage Infarct  
613 size per brain section 24 hours after HI. **d** Representative images of coronal brain sections  
614 from WT and HCAR1 KO mice 42 days after HI. **e** Brain tissue loss (% of total quantified  
615 tissue volume) 42 days after HI. **f** Percentage tissue loss per section 42 days after HI. Error  
616 bars indicate SD. Statistical significance was calculated using a two-tailed t-test (\* $p < 0.05$ ,  
617 \*\* $p < 0.01$ , \*\*\*  $p < 0.001$ , \*\*\*\*  $p < 0.0001$ ).

618 **Figure 2: HCAR1 regulates neural stem and progenitor cell proliferation and**  
619 **differentiation**

620 **a-i** Neurosphere formation from HCAR1 KO and WT cells. **a-b** Images of neurospheres from  
621 WT (a) and HCAR1 KO (b) mice. **c-f** Fluorescence images from WT (c, e) and HCAR1 KO  
622 (d, f) dissociated neurospheres after induced differentiation. Scale bare is 400  $\mu\text{m}$ . **c-d** are  
623 stained with the neuronal marker Tuj1 and **e-f** are stained with the astrocyte marker GFAP. **g**  
624 Number of colonies formed per well. Each well was started with 10 000 cells. **h** Size of  
625 neurospheres ( $\text{um}^2$ ). **i** Percentage of cells positive for the neuronal marker Tuj1 or the  
626 astrocyte marker GFAP after induced differentiation of dissociated neurospheres. Data in **g-i**  
627 are shown as mean  $\pm$ SD.  $n = 3$  clones per genotype. **j-r** quantification of proliferating cells  
628 and neural progenitors after HI. **j** animation of a coronal mouse brain section illustrating the  
629 core of the infarct in the ipsilateral hemisphere (IPSI), the contralateral hemisphere (contra,  
630 used as control) as well as the proliferative subventricular sone (SVZ) and intermediate zone  
631 (IZ). **k-n** confocal images from coronal mouse brain sections labelled for DAPI (blue),  
632 doublecortin (DCX, marker of neuronal progenitor cells, green) and BrdU (injected  
633 proliferation marker, white). The images show the subventricular and intermediate zones in  
634 the contralateral (k, m) and ipsilateral (l, n) hemispheres in WT (k-l) and KO (m-n) mice. **o-q**  
635 Density of DAPI+ nuclei (i.e. all cells, o), BrdU+ cells (all proliferating cells, p) and DCX+  
636 cells (neural progenitor cells, q) in the intermediate zones of the ipsi- (pink bars) and  
637 contralateral (white bars) hemispheres of WT and KO mice. **r** density of proliferating neural

638 progenitor cells (i.e. cells that were both DCX+ and BrdU+ or Ki67+). \* $p < 0.05$ ; \*\* $p < 0.01$ .  
639 Each point represents one sample/mouse. Ipsi- and contralateral samples from the same  
640 mouse are indicated with a line. WT  $n = 3-5$ , KO  $n = 4-6$ . Scale bars are 50  $\mu\text{m}$ .

641 **Figure 3: HCAR1 KO mice have deficient activation and proliferation of microglia after**  
642 **HI**

643 **a-d** Confocal images from the peri-infarct zone (b, d, indicated as square in cartoon) and  
644 corresponding contralateral area (a, c) of coronal mouse brain sections from WT (a-b) and KO  
645 (c-d) labelled for BrdU (proliferating cells, magenta), Iba1 (microglia, green) and DAPI (blue  
646 nuclei). Scale bars are 100  $\mu\text{m}$ . **e** Density of microglia (IBA1+ cells) in the peri-infarct zone  
647 (pink bars) and contralateral striatum (white bars) of WT and KO mice. **f** Density of  
648 proliferating microglia (i.e. cells that were both IBA1+ and BrdU+). **g-h** Assessment of  
649 microglia activation by morphology. When activated, microglia somata increase in size and  
650 get shorter and fewer branches. **g** average size of microglia somata. **h** Average maximum  
651 branch length. \* $p < 0.05$ ; \*\* $p < 0.01$ . Each point represents one sample/mouse. Ipsi- and  
652 contralateral samples from the same mouse are indicated with a line. WT  $n = 8$ , KO  $n = 7-10$ .

653 **Figure 4: HCAR1 regulates transcriptional response to ischemia including cell cycle and**  
654 **complement pathway**

655 **a** PCA plot of transcriptome data from subventricular zone tissue samples from the ipsilateral  
656 (HI-damaged) and contralateral (control) hemisphere in HCAR1 KO and WT mice. Each  
657 point represents one sample/mouse. Each colour represents a group. **b** Gene set enrichment  
658 analysis (GSEA) of HCAR1 KO ipsi versus WT ipsi showing the ten most up- or  
659 downregulated pathways ( $FDR < 0.05$ ). **c** Heatmap showing relative expression of a subset of  
660 differentially expressed genes (DEGs) enriched in the cell cycle. **d** DEGs related to  
661 complement and coagulation cascades (immune system response involved in activation of  
662 microglia. **e** DEGs that are markers of microglia activation (based on DePaula-Silva et al.,  
663 2019<sup>42</sup>). Genes shown in c-e were differentially expressed in HCAR1 KO ipsi versus WT ipsi,  
664 but expression is shown in all samples from all four experimental groups (see bottom of  
665 figures).

666 **Figure 5: Proposed model for the role of HCAR1 in neonatal HI**

667 During and after HI, the extracellular concentration of lactate ( $[\text{lac}]_o$ ) is elevated. **Top panel:**  
668 In WT mice, the elevated lactate causes HCAR1 activation, which induces transcription of

669 genes involved in tissue response to ischemia. This includes genes responsible for  
670 neurogenesis and innate immunity, thereby promoting tissue repair. **Bottom panel:** In  
671 HCAR1 KO mice, the transcriptional response to ischemia is severely reduced. Without the  
672 HCAR1-induced gene transcription, there is little neurogenesis and innate immune response,  
673 which in turn gives an impaired tissue repair.

674

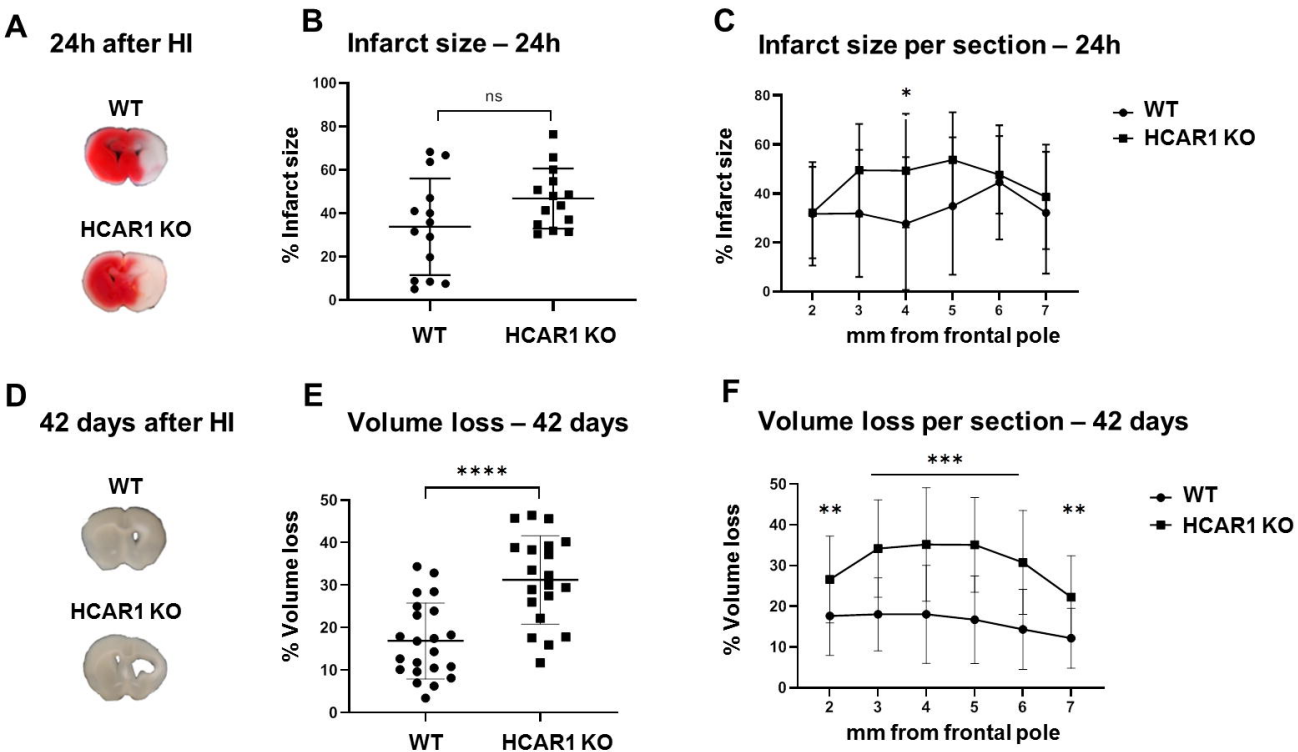

Figure 1



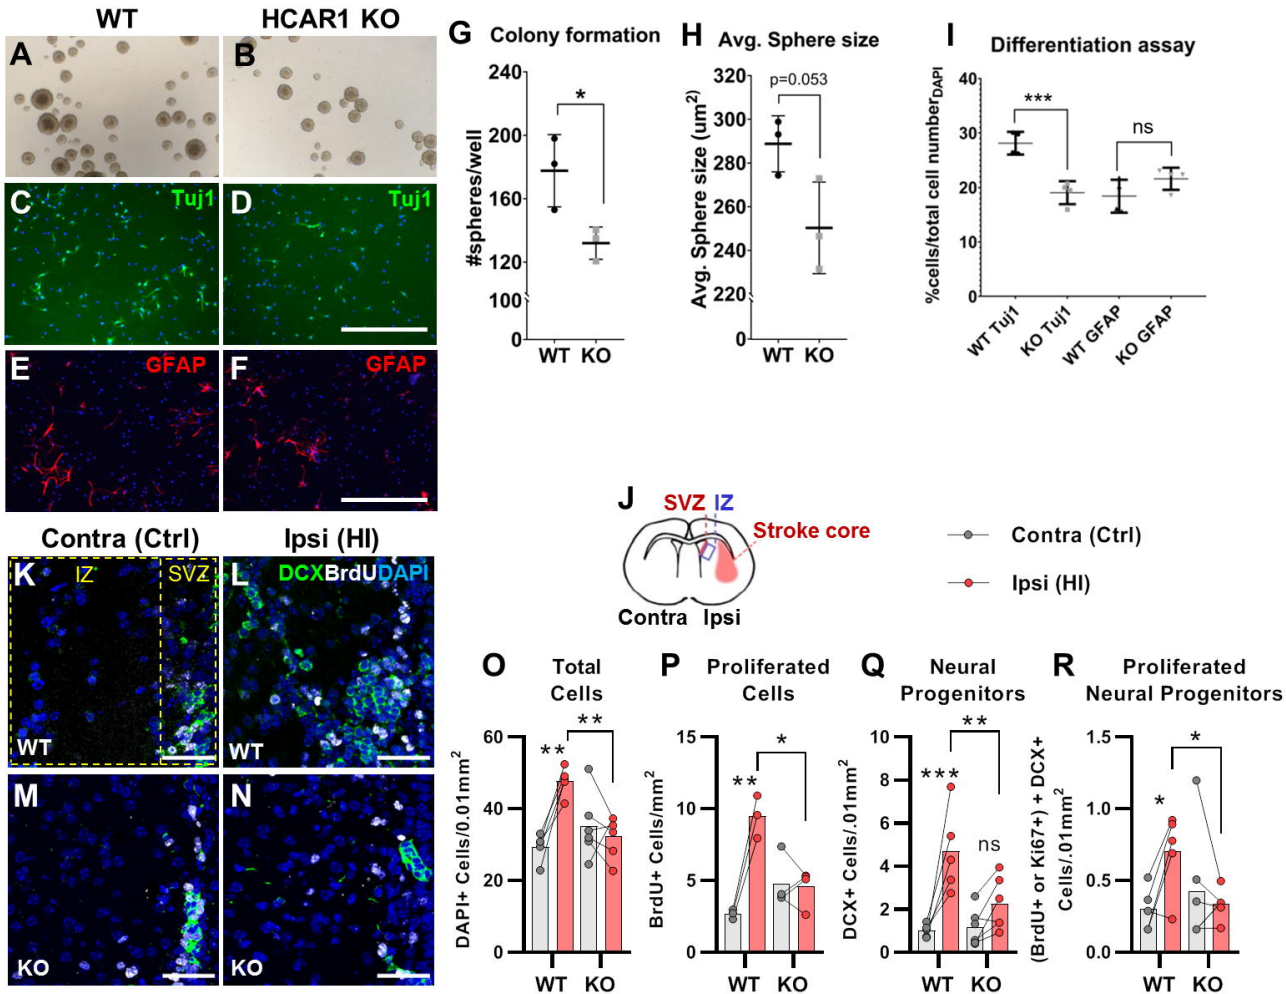

Figure 2

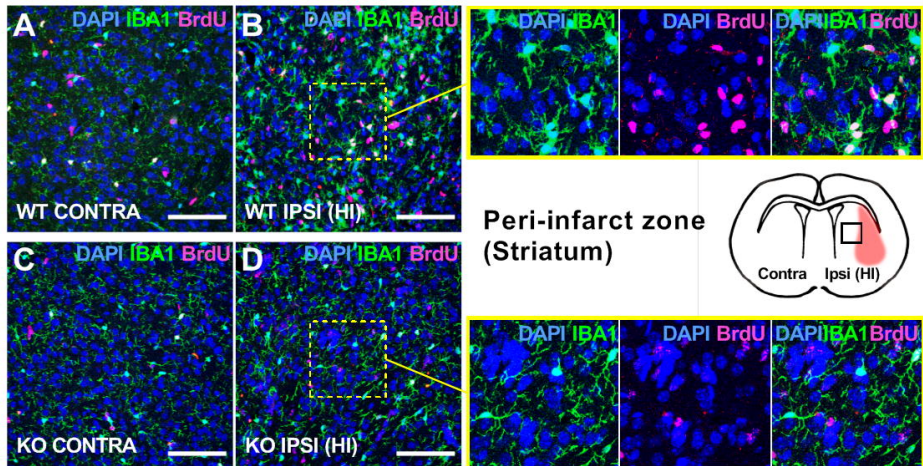

—●— Contra (Ctrl)    —●— Ipsi (HI)

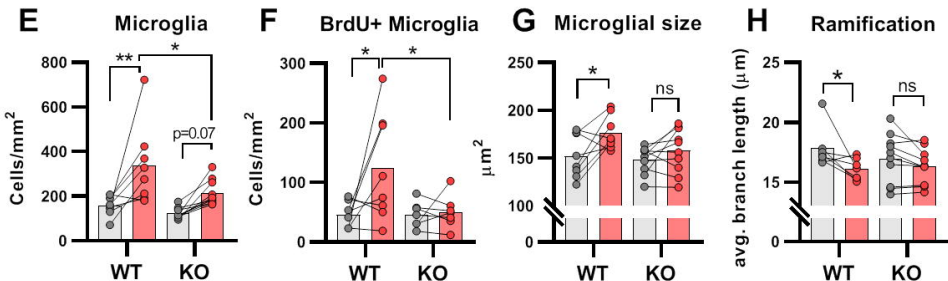

Figure 3

### A PCA plot

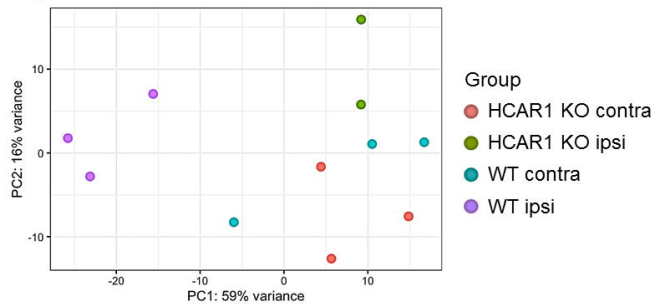

### B GSEA

#### HCAR1 KO ipsi vs WT ipsi

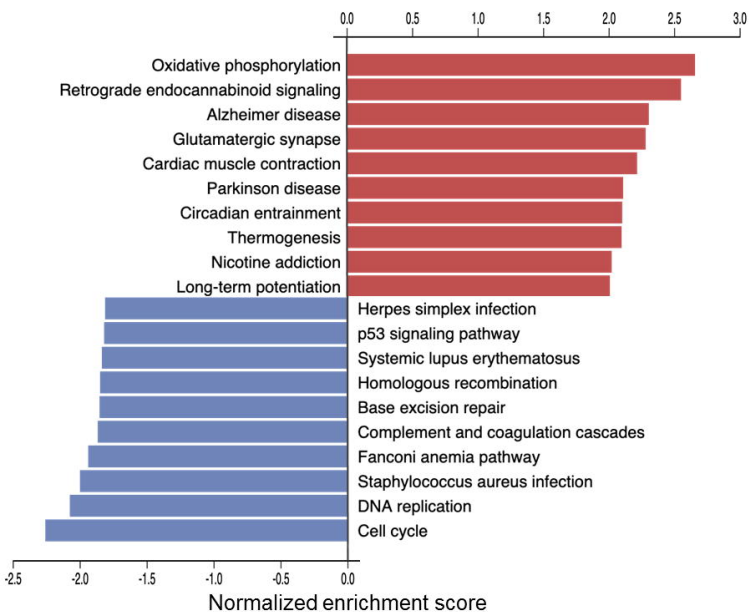

### C Cell cycle

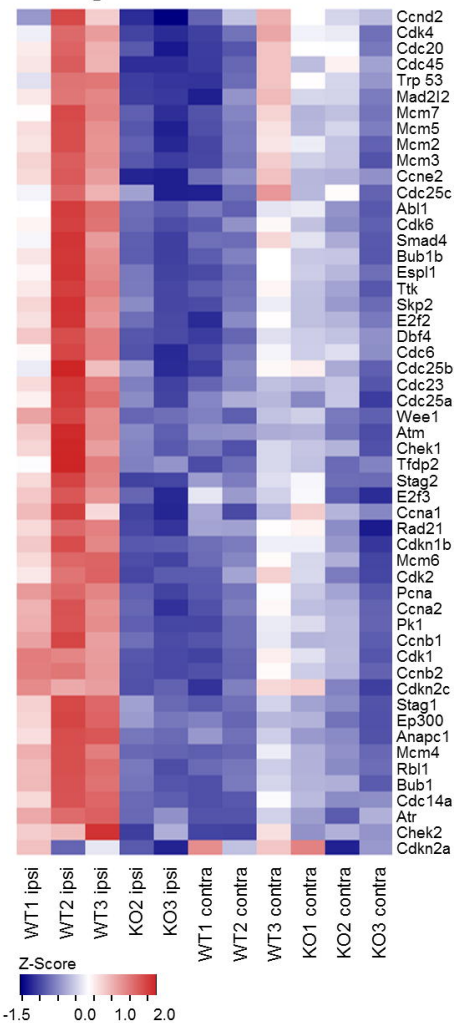

### D Complement & coagulation cascades

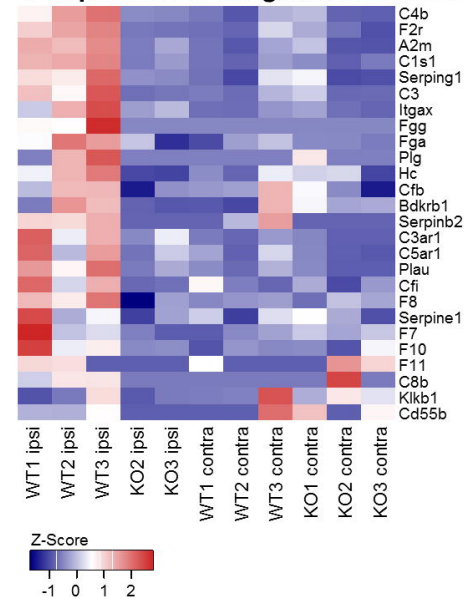

### E Microglia

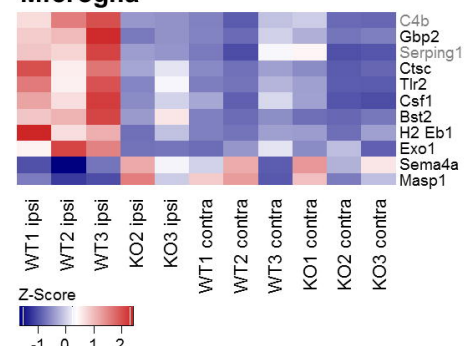

Figure 4

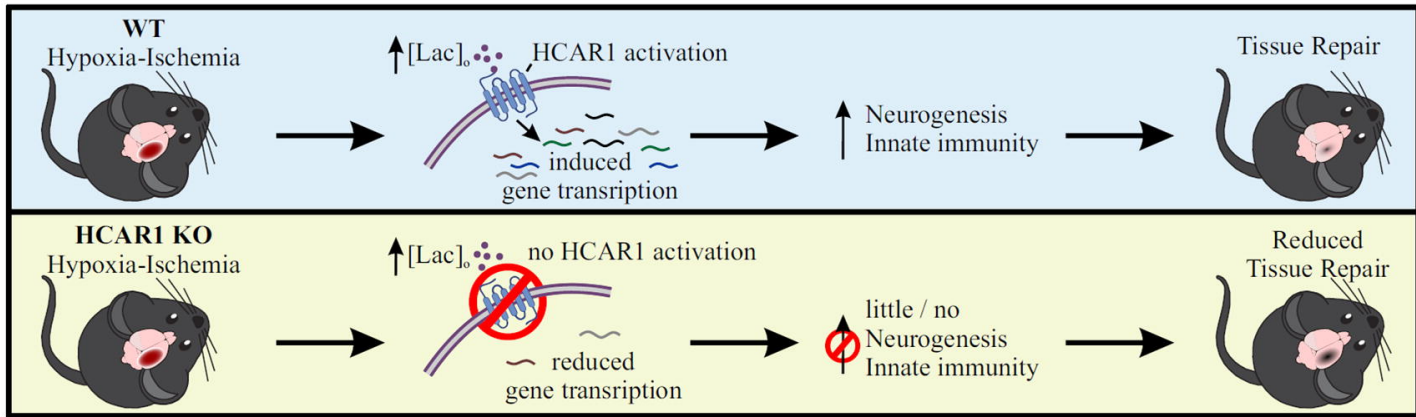

Figure 5
